# Supplementary material
Source: PubMed Central journal article supplement (PMC5710248)
Supplement: jamapsychiatry-74-747-s001.pdf [file jamapsychiatry-74-747-s001.pdf]

## Supplementary Online Content

Bushnell GA, Stürmer T, Gaynes BN, Pate V, Miller M. Simultaneous antidepressant and benzodiazepine new use and subsequent long-term benzodiazepine use in adults with depression, United States, 2001-2014. *JAMA Psychiatry*. Published online June 7, 2017. doi:10.1001/jamapsychiatry.2017.1273

**eFigure 1.** Proportion of Patients with Simultaneous New Use of an Antidepressant and a Benzodiazepine by Age at Antidepressant Treatment Initiation

**eFigure 2.** Proportion of Antidepressant and Benzodiazepine Simultaneous New Users Who Became Long-term Benzodiazepine Users

**eTable 1.** Characteristics of Simultaneous Antidepressant and Benzodiazepine New Users and Non-Simultaneous Antidepressant New Users With Depression and Factors Associated With Simultaneous New Use (Full List of Characteristics)

**eTable 2.** Details of the Initial Benzodiazepine Prescription Among Antidepressant and Benzodiazepine Simultaneous New Users: Overall and by Selected Physicians

**eTable 3.** Long-term Benzodiazepine Use Among Simultaneous New Users by Baseline Patient Characteristics and Initial Prescription Details (Full List of Characteristics)

**This supplementary material has been provided by the authors to give readers additional information about their work.**

**eFigure 1.** Proportion of Patients With Simultaneous New Use of an Antidepressant and a Benzodiazepine by Age at Antidepressant Treatment Initiation

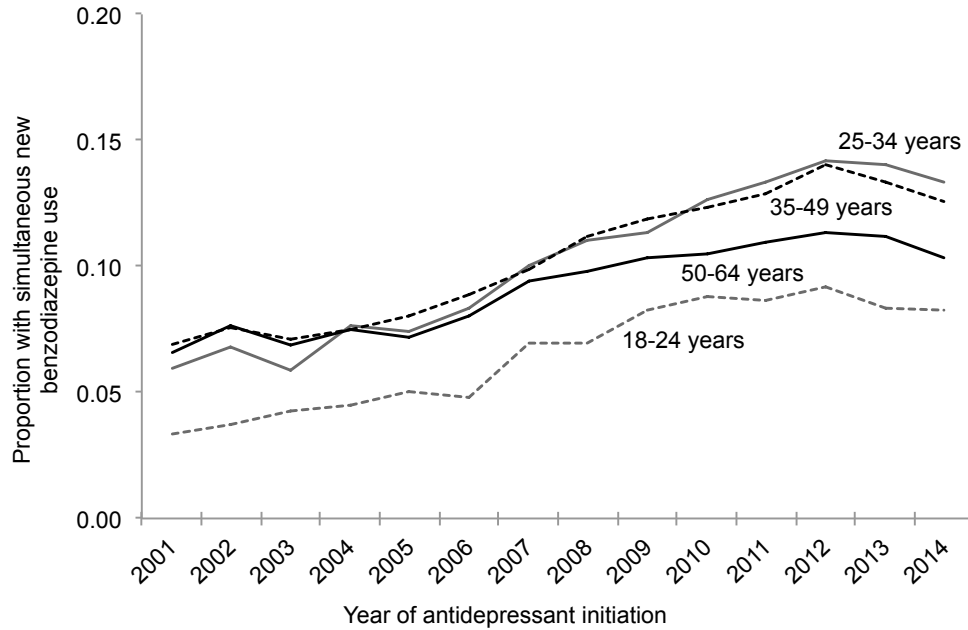

Proportions internally standardized (reference year=2012) by sex and region; excluded patients with unknown region (remaining n=755,489)

**eFigure 2.** Proportion of Antidepressant and Benzodiazepine Simultaneous New Users Who Became Long-term Benzodiazepine Users

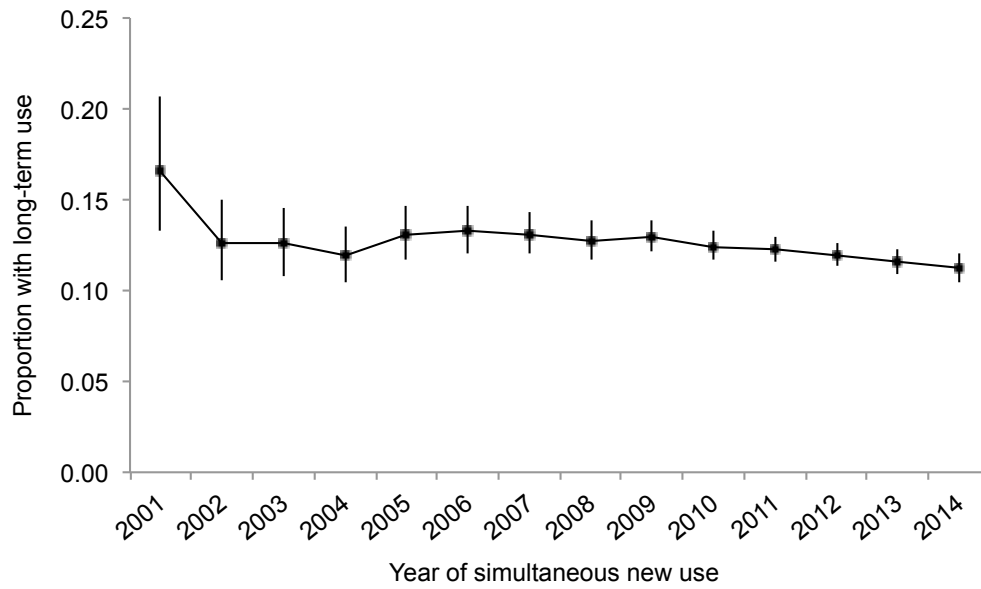

Error bars represent the 95% CI; Decreasing error bar size related to increasing sample size in the datasource

**eTable 1.** Characteristics of Simultaneous Antidepressant and Benzodiazepine New Users and Non-Simultaneous Antidepressant New Users With Depression and Factors Associated With Simultaneous New Use (Full List of Characteristics)<sup>a</sup>

|                                                             | Non-Simultaneous New Users (N=684,110) No. (%) | Simultaneous New Users (N=81,020) No. (%) | Simultaneous New Use               |          |                           |
|-------------------------------------------------------------|------------------------------------------------|-------------------------------------------|------------------------------------|----------|---------------------------|
|                                                             |                                                |                                           | Simultaneous New Users, % (95% CI) | Crude RR | Multivariable RR (95% CI) |
| Male                                                        | 231,600 (34)                                   | 26,079 (32)                               | 10% (10-10)                        | REF      | REF                       |
| Female                                                      | 452,510 (66)                                   | 54,941 (68)                               | 11% (11-11)                        | 1.07     | 1.09 (1.08-1.11)          |
| Age (years), Median (IQR)                                   | 39 (29, 49)                                    | 39 (30, 49)                               |                                    |          |                           |
| 18-24                                                       | 120,403 (18)                                   | 10,140 (13)                               | 8% (8-8)                           | REF      | REF                       |
| 25-34                                                       | 144,620 (21)                                   | 19,358 (24)                               | 12% (12-12)                        | 1.52     | 1.59 (1.56-1.63)          |
| 35-49                                                       | 249,217 (36)                                   | 32,715 (40)                               | 12% (11-12)                        | 1.49     | 1.68 (1.64-1.71)          |
| 50-64                                                       | 169,870 (25)                                   | 18,807 (23)                               | 10% (10-10)                        | 1.28     | 1.55 (1.51-1.59)          |
| Year of antidepressant new use                              |                                                |                                           |                                    |          |                           |
| 2001-2004                                                   | 66,776 (10)                                    | 4,844 (6)                                 | 7% (7-7)                           | 0.58     | 0.66 (0.64-0.68)          |
| 2005-2008                                                   | 146,587 (21)                                   | 14,101 (17)                               | 9% (9-9)                           | 0.75     | 0.84 (0.82-0.85)          |
| 2009-2012                                                   | 305,126 (45)                                   | 40,426 (50)                               | 12% (12-12)                        | REF      | REF                       |
| 2013-2014                                                   | 165,621 (24)                                   | 21,649 (27)                               | 12% (11-12)                        | 0.99     | 0.92 (0.91-0.94)          |
| Initial antidepressant class                                |                                                |                                           |                                    |          |                           |
| SSRI                                                        | 474,001 (69)                                   | 64,460 (80)                               | 12% (12-12)                        | REF      | REF                       |
| SNRI                                                        | 65,935 (10)                                    | 5,554 (7)                                 | 8% (8-8)                           | 0.65     | 0.69 (0.67-0.70)          |
| Bupropion                                                   | 86,725 (13)                                    | 5,667 (7)                                 | 6% (6-6)                           | 0.51     | 0.57 (0.56-0.59)          |
| Other                                                       | 57,449 (8)                                     | 5,339 (7)                                 | 9% (8-9)                           | 0.71     | 0.65 (0.63-0.67)          |
| Depression diagnosis (index diagnosis) <sup>b</sup>         |                                                |                                           |                                    |          |                           |
| Not otherwise specified                                     | 339,912 (50)                                   | 32,443 (40)                               | 9% (9-9)                           | REF      | REF                       |
| Major depressive disorder                                   | 178,503 (26)                                   | 23,466 (29)                               | 12% (11-12)                        | 1.33     | 1.40 (1.38-1.43)          |
| Other                                                       | 165,695 (24)                                   | 25,111 (31)                               | 13% (13-13)                        | 1.51     | 1.75 (1.72-1.78)          |
| Inpatient index depression diagnosis                        | 13,144 (2)                                     | 2,398 (3)                                 | 15% (15-16)                        | 1.47     | 1.34 (1.29-1.40)          |
| Non-recent depression diagnosis                             | 161,261 (24)                                   | 13,328 (16)                               | 8% (8-8)                           | 0.67     | 0.71 (0.69-0.72)          |
| Physician specialty who provided index depression diagnosis |                                                |                                           |                                    |          |                           |
| Family practice                                             | 229,862 (34)                                   | 27,350 (34)                               | 11% (11-11)                        | REF      | REF                       |
| Psychiatry                                                  | 86,879 (13)                                    | 13,398 (17)                               | 13% (13-14)                        | 1.26     | 1.32 (1.29-1.35)          |
| Psychologist, therapist                                     | 70,953 (10)                                    | 6,673 (8)                                 | 9% (8-9)                           | 0.81     | 0.85 (0.83-0.88)          |
| Other specialty                                             | 234,533 (34)                                   | 26,513 (33)                               | 10% (10-10)                        | 0.96     | 0.98 (0.96-0.99)          |
| Unknown or multiple physicians                              | 61,883 (9)                                     | 7,086 (9)                                 | 10% (10-11)                        | 0.97     | 0.93 (0.91-0.96)          |
| Anxiety disorder diagnosis, recent                          |                                                |                                           |                                    |          |                           |
| Unspecified anxiety                                         | 52,389 (8)                                     | 16,651 (21)                               | 24% (24-24)                        | 2.61     | 2.58 (2.54-2.62)          |
| Generalized anxiety disorder                                | 21,350 (3)                                     | 5,705 (7)                                 | 21% (21-22)                        | 2.07     | 1.90 (1.85-1.95)          |
| Panic disorder                                              | 4,471 (1)                                      | 2,870 (4)                                 | 39% (38-40)                        | 3.79     | 2.67 (2.58-2.76)          |
| PTSD                                                        | 4,819 (1)                                      | 783 (1)                                   | 14% (13-15)                        | 1.32     | 1.14 (1.05-1.22)          |
| OCD, phobic disorder, other anxiety                         | 5,910 (1)                                      | 1,465 (2)                                 | 20% (19-21)                        | 1.89     | 1.47 (1.40-1.55)          |
| Non-recent anxiety diagnosis only                           | 23,422 (3)                                     | 2,255 (3)                                 | 9% (8-9)                           | 0.82     | 1.11 (1.06-1.15)          |
| Insomnia or sleep disturbance                               | 39,006 (6)                                     | 6,618 (8)                                 | 15% (14-15)                        | 1.40     | 1.31 (1.28-1.34)          |

|                                                        |              |             |             |      |                  |
|--------------------------------------------------------|--------------|-------------|-------------|------|------------------|
| diagnosis, recent                                      |              |             |             |      |                  |
| Psychiatric co-morbidities                             |              |             |             |      |                  |
| ADHD                                                   | 20,452 (3)   | 1,329 (2)   | 6% (6-6)    | 0.57 | 0.63 (0.59-0.66) |
| Acute reaction to stress                               | 9,030 (1)    | 1,936 (2)   | 18% (17-18) | 1.68 | 1.43 (1.37-1.49) |
| Adjustment disorder <sup>c</sup>                       | 22,968 (3)   | 3,086 (4)   | 12% (11-12) | 1.12 | 1.06 (1.02-1.10) |
| Other episodic mood disorder                           | 7,088 (1)    | 678 (1)     | 9% (8-9)    | 0.82 | 0.83 (0.78-0.90) |
| Treated self-harm                                      | 861 (<1)     | 83 (<1)     | 9% (7-11)   | 0.83 | 0.74 (0.59-0.92) |
| Psychotherapy, recent                                  |              |             |             |      |                  |
| None recorded                                          | 529,351 (77) | 64,845 (80) | 11% (11-11) | REF  | REF              |
| ≥1 session                                             | 154,759 (23) | 16,175 (20) | 9% (9-10)   | 0.87 | 0.83 (0.81-0.85) |
| Fall, fracture risk factors                            |              |             |             |      |                  |
| Fracture (excluding skull)                             | 16,079 (2)   | 1,959 (2)   | 11% (10-11) | 1.03 | 1.09 (1.04-1.13) |
| Bone mineral density scan                              | 18,767 (3)   | 1,908 (2)   | 9% (9-10)   | 0.87 | 0.92 (0.88-0.97) |
| Osteoporosis                                           | 6,464 (1)    | 647 (1)     | 9% (8-10)   | 0.86 | 0.95 (0.88-1.03) |
| Cataracts or glaucoma                                  | 19,612 (3)   | 2,014 (2)   | 9% (9-10)   | 0.88 | 0.92 (0.88-0.96) |
| Visual disturbance/loss                                | 8,803 (1)    | 980 (1)     | 10% (9-11)  | 0.95 | 0.95 (0.89-1.00) |
| Poisoning <sup>d</sup>                                 | 4,117 (1)    | 423 (1)     | 9% (8-10)   | 0.88 | 0.84 (0.76-0.92) |
| Non-psychiatric co-morbidities                         |              |             |             |      |                  |
| Cardiac dysrhythmias                                   | 17,114 (3)   | 1,985 (2)   | 10% (10-11) | 0.98 | 0.95 (0.91-1.00) |
| Cardiac disorders <sup>e</sup>                         | 25,924 (4)   | 3,173 (4)   | 11% (11-11) | 1.03 | 1.06 (1.02-1.10) |
| Chronic kidney disease                                 | 3,670 (1)    | 362 (<1)    | 9% (8-10)   | 0.85 | 0.95 (0.86-1.05) |
| Osteoarthritis and allied disorders                    | 30,654 (4)   | 3,216 (4)   | 9% (9-10)   | 0.89 | 0.94 (0.91-0.97) |
| Crohn's disease, gastroenteritis                       | 18,352 (3)   | 2,281 (3)   | 11% (11-11) | 1.05 | 1.06 (1.02-1.10) |
| Diabetes                                               | 43,589 (6)   | 4,372 (5)   | 9% (9-9)    | 0.85 | 0.91 (0.88-0.94) |
| Epilepsy, recurrent seizures                           | 3,458 (1)    | 321 (<1)    | 8% (8-9)    | 0.80 | 0.80 (0.72-0.89) |
| Fatigue, malaise                                       | 112,920 (17) | 11,383 (14) | 9% (9-9)    | 0.84 | 0.85 (0.84-0.87) |
| Hearing loss/problem                                   | 9,571 (1)    | 1,014 (1)   | 10% (9-10)  | 0.90 | 0.92 (0.87-0.97) |
| Hypertension                                           | 112,969 (17) | 12,640 (16) | 10% (10-10) | 0.94 | 0.92 (0.91-0.94) |
| Hypothyroidism                                         | 47,405 (7)   | 4,941 (6)   | 9% (9-10)   | 0.88 | 0.90 (0.87-0.92) |
| Overweight, obese                                      | 40,729 (6)   | 4,292 (5)   | 10% (9-10)  | 0.89 | 0.86 (0.84-0.89) |
| Urinary incontinence                                   | 5,125 (1)    | 515 (1)     | 9% (8-10)   | 0.86 | 0.90 (0.83-0.97) |
| Outpatient problem-oriented visit, Median (IQR)        | 4 (2, 6)     | 3 (2, 6)    |             |      |                  |
| 0-1                                                    | 124,224 (18) | 16,077 (20) | 11% (11-12) | REF  | REF              |
| 2-6                                                    | 399,455 (58) | 47,266 (58) | 11% (10-11) | 0.92 | 0.94 (0.93-0.96) |
| >6                                                     | 160,431 (23) | 17,677 (22) | 10% (10-10) | 0.87 | 0.91 (0.89-0.93) |
| Inpatient admission, non-psychiatric related           | 53,321 (8)   | 5,719 (7)   | 10% (9-10)  | 0.91 | 0.90 (0.87-0.92) |
| Count of medications by therapeutic group <sup>f</sup> | 3 (1, 5)     | 3 (1, 5)    |             |      |                  |
| 0-1                                                    | 187,505 (27) | 22,702 (28) | 11% (11-11) | REF  | REF              |
| 2-6                                                    | 390,209 (57) | 45,863 (57) | 11% (10-11) | 0.97 | 1.02 (1.01-1.04) |
| >6                                                     | 106,396 (16) | 12,455 (15) | 10% (10-11) | 0.97 | 1.11 (1.08-1.13) |
| Opioid prescription, recent                            | 45,916 (7)   | 6,006 (7)   | 12% (11-12) | 1.10 | 1.15 (1.12-1.18) |
| Region                                                 |              |             |             |      |                  |
| Northeast                                              | 79,719 (12)  | 10,466 (13) | 12% (11-12) | 1.10 | 1.12 (1.10-1.15) |
| North Central                                          | 192,051 (28) | 20,700 (26) | 10% (10-10) | 0.92 | 0.99 (0.98-1.01) |
| South                                                  | 249,091 (36) | 30,291 (37) | 11% (11-11) | 1.03 | 1.05 (1.04-1.07) |
| West                                                   | 154,927 (23) | 18,244 (23) | 11% (10-11) | REF  | REF              |
| Unknown                                                | 8,322 (1)    | 1,319 (2)   | 14% (13-14) | 1.30 | 1.28 (1.22-1.35) |

Recent refers to measures within 30 days before antidepressant initiation (non-recent: 31-365 days prior); IQR: interquartile range, PTSD: Post traumatic stress disorder, OCD: Obsessive compulsive disorder, ADHD: Attention-deficit/hyperactivity disorder, REF: Reference

<sup>a</sup>Table 1 in manuscript is a reduced version of eTable1; Variables removed from full model given independent association with simultaneous new use of 0.952<RR<1.05: Non-recent insomnia/sleep disturbance diagnosis, fall related injury (ICD-

9: E880-E886, E888), fainting/dizziness, gait/lack of coordination, head injury/concussion, dislocation/sprain, other injury, non-psychiatric co-morbidities (anemia, asthma or chronic obstructive pulmonary disease, cerebrovascular disease, gastroesophageal reflux disease, liver disease, migraine/chronic headache, myocardial infarction), psychiatric related inpatient admission

<sup>b</sup>Index depression diagnosis: other includes adults diagnosed with dysthymic disorder, adjustment disorder with depressed mood, or prolonged depressive reaction; not otherwise specified includes adults without a specific diagnosis

<sup>c</sup>Excludes ICD-9 309.0x: Adjustment disorder with depressed mood and 309.1x: Prolonged depressive reaction

<sup>d</sup>Defined with ICD-9 codes=960-979 (range for poisoning by drugs, medicinals and biological substances)

<sup>e</sup>Cardiac disorders defined based on Elixhauser cardiac definition

<sup>f</sup>Count of therapeutic group excludes day of antidepressant/benzodiazepine initiation

**eTable 2.** Details of the Initial Benzodiazepine Prescription Among Antidepressant and Benzodiazepine Simultaneous New Users: Overall and by Selected Physicians

|                                                  | Simultaneous new users (N=81,020) | Diagnosing provider type <sup>a</sup> |                            |                  |
|--------------------------------------------------|-----------------------------------|---------------------------------------|----------------------------|------------------|
|                                                  |                                   | Psychiatry (N=13,398)                 | Family practice (N=27,350) | Other (N=40,272) |
| Initial benzodiazepine prescription <sup>b</sup> | No. (%)                           | No. (%)                               | No. (%)                    | No. (%)          |
| Long-acting agent                                | 20,296 (25)                       | 5,019 (37)                            | 5,907 (22)                 | 9,370 (23)       |
| Days supply, median (IQR)                        | 20 (10, 30)                       | 30 (15, 30)                           | 15 (10, 30)                | 16 (10, 30)      |
| 1-7 days                                         | 10,913 (13)                       | 896 (7)                               | 4,117 (15)                 | 5,900 (15)       |
| 8-21 days                                        | 34,064 (42)                       | 3,549 (26)                            | 13,094 (48)                | 17,421 (43)      |
| 22-35 days                                       | 34,640 (43)                       | 8,469 (63)                            | 9,880 (36)                 | 16,291 (40)      |
| >35 days                                         | 1,399 (2)                         | 484 (4)                               | 258 (1)                    | 657 (2)          |
| Quantity dispensed, median (IQR)                 | 30 (30, 60)                       | 30 (30, 60)                           | 30 (30, 45)                | 30 (25, 50)      |
| 1-24 pills                                       | 18,511 (23)                       | 2,046 (15)                            | 6,452 (24)                 | 10,013 (25)      |
| 25-50 pills                                      | 41,369 (51)                       | 6,062 (45)                            | 14,895 (54)                | 20,412 (51)      |
| >50 pills                                        | 21,136 (26)                       | 5,290 (39)                            | 6,002 (22)                 | 9,844 (24)       |
| Pills-per-day, median (IQR) <sup>c</sup>         | 2 (1, 3)                          | 2 (1, 3)                              | 2 (1, 3)                   | 2 (1, 3)         |
| 1 pill (<1.5)                                    | 25,591 (32)                       | 5,088 (38)                            | 7,774 (28)                 | 12,729 (32)      |
| 2 pills (1.5 to <2.5)                            | 26,138 (32)                       | 4,837 (36)                            | 8,633 (32)                 | 12,668 (31)      |
| 3+ pills (>2.5)                                  | 29,287 (36)                       | 3,473 (26)                            | 10,942 (40)                | 14,872 (37)      |
| Dose-per-day                                     |                                   |                                       |                            |                  |
| Less than modal dose                             | 18,063 (22)                       | 3,768 (28)                            | 5,187 (19)                 | 9,108 (23)       |
| Modal dose                                       | 24,425 (30)                       | 4,644 (35)                            | 7,871 (29)                 | 11,910 (30)      |
| Greater than modal dose                          | 38,528 (48)                       | 4,986 (37)                            | 14,291 (52)                | 19,251 (48)      |

<sup>a</sup>Provider associated with the index depression diagnosis

<sup>b</sup>Patients (n=4) with an index benzodiazepine in a solution form missing days supply, quantity, pills-per-day, dose-per-day; Days supply and quantity values ≤0 were set to the median value (30), days supply values >99 were truncated to 100, and quantity values >200 were truncated to 200. For patients with multiple agents (0.9%) if one agent was long-acting they were classified as initiating on a long-acting agent and we defined modal dose based on the highest modal dose-per-day classification

<sup>c</sup>Ranges represent calculated values from quantity dispensed/day supply

**eTable 3.** Long-term Benzodiazepine Use Among Simultaneous New Users by Baseline Patient Characteristics and Initial Prescription Details (Full List of Characteristics)<sup>a</sup>

|                                                             | Non-long term benzodiazepine users (N=54,900) | Long-term benzodiazepine users (N=6,582) | Long-term benzodiazepine use |                           |
|-------------------------------------------------------------|-----------------------------------------------|------------------------------------------|------------------------------|---------------------------|
|                                                             | No. (%)                                       | No. (%)                                  | Crude RR                     | Multivariable RR (95% CI) |
| Male                                                        | 17,091 (31)                                   | 2,610 (40)                               | REF                          | REF                       |
| Female                                                      | 37,809 (69)                                   | 3,972 (60)                               | 0.72                         | 0.78 (0.74-0.81)          |
| Age (years), median (IQR)                                   | 39 (31, 49)                                   | 42 (32, 51)                              |                              |                           |
| 18-24                                                       | 6,806 (12)                                    | 706 (11)                                 | REF                          | REF                       |
| 25-34                                                       | 12,740 (23)                                   | 1,270 (19)                               | 0.96                         | 1.00 (0.92-1.09)          |
| 35-49                                                       | 22,642 (41)                                   | 2,753 (42)                               | 1.15                         | 1.15 (1.07-1.25)          |
| 50-64                                                       | 12,712 (23)                                   | 1,853 (28)                               | 1.35                         | 1.27 (1.17-1.38)          |
| Initial antidepressant class                                |                                               |                                          |                              |                           |
| SSRI                                                        | 43,993 (80)                                   | 4,855 (74)                               | REF                          | REF                       |
| SNRI                                                        | 3,661 (7)                                     | 607 (9)                                  | 1.43                         | 1.19 (1.11-1.29)          |
| Bupropion                                                   | 3,884 (7)                                     | 478 (7)                                  | 1.10                         | 1.00 (0.91-1.09)          |
| Other                                                       | 3,362 (6)                                     | 642 (10)                                 | 1.61                         | 1.17 (1.08-1.26)          |
| Depression diagnosis (index diagnosis) <sup>b</sup>         |                                               |                                          |                              |                           |
| Not otherwise specified                                     | 22,134 (40)                                   | 2,203 (33)                               | REF                          | REF                       |
| Major depressive disorder                                   | 15,411 (28)                                   | 2,744 (42)                               | 1.67                         | 1.19 (1.12-1.26)          |
| Other                                                       | 17,355 (32)                                   | 1,635 (25)                               | 0.95                         | 0.95 (0.90-1.01)          |
| Inpatient index depression diagnosis                        | 1,442 (3)                                     | 373 (6)                                  | 1.97                         | 1.16 (0.99-1.36)          |
| Physician specialty who provided index depression diagnosis |                                               |                                          |                              |                           |
| Family practice                                             | 18,655 (34)                                   | 1,675 (25)                               | REF                          | REF                       |
| Psychiatry                                                  | 8,661 (16)                                    | 1,884 (29)                               | 2.17                         | 1.37 (1.27-1.47)          |
| Psychologist, therapist                                     | 4,826 (9)                                     | 524 (8)                                  | 1.19                         | 1.03 (0.94-1.14)          |
| Other specialty                                             | 18,185 (33)                                   | 1,968 (30)                               | 1.19                         | 1.08 (1.02-1.15)          |
| Unknown or multiple physicians                              | 4,573 (8)                                     | 531 (8)                                  | 1.26                         | 1.08 (0.98-1.18)          |
| Short vs. long-acting benzodiazepine <sup>c</sup>           |                                               |                                          |                              |                           |
| Short or intermediate-acting                                | 41,820 (76)                                   | 4,283 (65)                               | REF                          | REF                       |
| Long-acting                                                 | 13,080 (24)                                   | 2,299 (35)                               | 1.61                         | 1.28 (1.22-1.34)          |
| Benzodiazepine index days supply <sup>c</sup>               | 15 (10, 30)                                   | 30 (15, 30)                              |                              |                           |
| 1-7 days                                                    | 7,948 (14)                                    | 373 (6)                                  | REF                          | REF                       |
| 8-21 days                                                   | 24,154 (44)                                   | 1,790 (27)                               | 1.54                         | 1.46 (1.30-1.64)          |
| 22-35 days                                                  | 22,041 (40)                                   | 4,103 (62)                               | 3.50                         | 2.91 (2.54-3.33)          |
| >35 days                                                    | 756 (1)                                       | 316 (5)                                  | 6.58                         | 4.90 (4.15-5.79)          |
| Initial benzodiazepine dose-per-day <sup>c</sup>            |                                               |                                          |                              |                           |
| Less than modal dose                                        | 12,147 (22)                                   | 1,525 (23)                               | 0.94                         | 0.88 (0.83-0.95)          |
| Modal dose                                                  | 16,303 (30)                                   | 2,193 (33)                               | REF                          | REF                       |
| Greater than modal dose                                     | 26,449 (48)                                   | 2,864 (44)                               | 0.82                         | 1.12 (1.06-1.18)          |
| Initial benzodiazepine quantity dispensed <sup>c</sup>      | 30 (30, 50)                                   | 30 (30, 60)                              |                              |                           |
| 1-24 pills                                                  | 13,171 (24)                                   | 767 (12)                                 | REF                          | REF                       |
| 25-50 pills                                                 | 28,306 (52)                                   | 3,252 (49)                               | 1.87                         | 1.18 (1.08-1.29)          |
| >50 pills                                                   | 13,422 (24)                                   | 2,563 (39)                               | 2.91                         | 1.14 (1.01-1.27)          |
| Anxiety disorder diagnosis, recent                          |                                               |                                          |                              |                           |
| Generalized anxiety disorder                                | 3,443 (6)                                     | 529 (8)                                  | 1.27                         | 1.16 (1.07-1.25)          |
| Panic disorder                                              | 1,735 (3)                                     | 249 (4)                                  | 1.18                         | 1.15 (1.02-1.29)          |
| PTSD                                                        | 496 (1)                                       | 75 (1)                                   | 1.23                         | 1.08 (0.83-1.39)          |



|                                                        |             |            |      |                  |
|--------------------------------------------------------|-------------|------------|------|------------------|
| OCD, phobic disorder, other anxiety                    | 893 (2)     | 171 (3)    | 1.51 | 1.27 (1.10-1.45) |
| Non-recent anxiety diagnosis only                      | 1,500 (3)   | 212 (3)    | 1.16 | 1.10 (0.97-1.25) |
| Insomnia or sleep disturbance diagnosis, recent        | 4,116 (7)   | 530 (8)    | 1.07 | 1.12 (1.03-1.22) |
| Non-recent                                             | 1,939 (4)   | 329 (5)    | 1.37 | 1.23 (1.11-1.37) |
| Psychiatric co-morbidities                             |             |            |      |                  |
| ADHD                                                   | 814 (1)     | 128 (2)    | 1.27 | 1.23 (1.04-1.45) |
| Acute reaction to stress                               | 1,307 (2)   | 102 (2)    | 0.67 | 0.76 (0.63-0.92) |
| Adjustment disorder <sup>d</sup>                       | 2,037 (4)   | 225 (3)    | 0.93 | 0.83 (0.71-0.96) |
| Other episodic mood disorder                           | 426 (1)     | 75 (1)     | 1.40 | 1.10 (0.89-1.35) |
| Treated self-harm                                      | 48 (<1)     | *          | *    | 0.95 (0.52-1.74) |
| Fall, fracture risk factors                            |             |            |      |                  |
| Fracture (excludes skull)                              | 1,285 (2)   | 210 (3)    | 1.32 | 1.16 (1.02-1.32) |
| Fall injury <sup>e</sup>                               | 290 (1)     | 34 (1)     | 0.98 | 0.90 (0.66-1.23) |
| Cataracts or glaucoma                                  | 1,331 (2)   | 168 (3)    | 1.05 | 0.92 (0.79-1.06) |
| Visual disturbance/loss                                | 622 (1)     | 94 (1)     | 1.23 | 1.16 (0.97-1.40) |
| Poisoning <sup>e</sup>                                 | 263 (<1)    | 65 (1)     | 1.86 | 1.29 (1.01-1.64) |
| Non-psychiatric co-morbidities                         |             |            |      |                  |
| Cerebrovascular disease                                | 680 (1)     | 126 (2)    | 1.47 | 1.06 (0.90-1.25) |
| Chronic kidney disease                                 | 236 (<1)    | 33 (1)     | 1.15 | 0.79 (0.57-1.10) |
| Osteoarthritis and allied disorders                    | 2,037 (4)   | 344 (5)    | 1.37 | 1.13 (1.02-1.26) |
| Crohn's disease/gastroenteritis                        | 1,475 (3)   | 218 (3)    | 1.21 | 1.12 (0.99-1.27) |
| Hearing loss/problem                                   | 713 (1)     | 86 (1)     | 1.01 | 0.90 (0.74-1.10) |
| Myocardial infarction                                  | 176 (<1)    | 39 (1)     | 1.70 | 1.20 (0.91-1.57) |
| Overweight, obese                                      | 2,743 (5)   | 290 (4)    | 0.89 | 0.85 (0.76-0.95) |
| Urinary incontinence                                   | 338 (1)     | 36 (1)     | 0.90 | 0.84 (0.62-1.14) |
| Outpatient problem-oriented visits, median (IQR)       | 4 (2, 6)    | 3 (2, 6)   |      |                  |
| 0-1                                                    | 10,592 (19) | 1,548 (24) | REF  | REF              |
| 2-6                                                    | 32,327 (59) | 3,531 (54) | 0.77 | 0.86 (0.81-0.92) |
| >6                                                     | 11,981 (22) | 1,503 (23) | 0.87 | 0.83 (0.76-0.90) |
| Inpatient admission                                    |             |            |      |                  |
| Psychiatric-related                                    | 1,427 (3)   | 370 (6)    | 1.98 | 1.21 (1.03-1.41) |
| Non-psychiatric-related                                | 3,801 (7)   | 503 (8)    | 1.10 | 0.93 (0.85-1.02) |
| Count of medications by therapeutic group <sup>f</sup> | 3 (1, 5)    | 3 (1, 6)   |      |                  |
| 0-1                                                    | 15,258 (28) | 1,845 (28) | REF  | REF              |
| 2-6                                                    | 31,339 (57) | 3,548 (54) | 0.94 | 1.02 (0.96-1.08) |
| >6                                                     | 8,303 (15)  | 1,189 (18) | 1.16 | 1.13 (1.04-1.23) |
| Opioid prescription, recent                            | 3,723 (7)   | 773 (12)   | 1.69 | 1.50 (1.39-1.61) |
| Year of simultaneous new use                           |             |            |      |                  |
| 2001-2004                                              | 3,718 (7)   | 477 (7)    | 1.05 | 0.96 (0.88-1.05) |
| 2005-2008                                              | 10,360 (19) | 1,350 (21) | 1.07 | 1.01 (0.95-1.07) |
| 2009-2012                                              | 28,851 (53) | 3,500 (53) | REF  | REF              |
| 2013-2014                                              | 11,971 (22) | 1,255 (19) | 0.88 | 0.89 (0.84-0.95) |
| Region                                                 |             |            |      |                  |
| Northeast                                              | 7,039 (13)  | 849 (13)   | 1.23 | 1.17 (1.08-1.27) |
| North Central                                          | 14,092 (26) | 1,691 (26) | 1.23 | 1.21 (1.13-1.30) |
| South                                                  | 19,917 (36) | 2,703 (41) | 1.37 | 1.27 (1.19-1.35) |
| West                                                   | 13,039 (24) | 1,246 (19) | REF  | REF              |
| Unknown                                                | 813 (1)     | 93 (1)     | 1.18 | 1.03 (0.84-1.25) |

Recent refers to measures within 30 days before antidepressant initiation; IQR: interquartile range, PTSD: Post traumatic stress disorder, OCD: Obsessive compulsive disorder, ADHD: Attention-deficit/hyperactivity disorder, REF: Reference

\*Not displayed due to small number

<sup>a</sup>Table 3 in manuscript is a reduced version of eTable3; Restricted to patients with 6-months of enrollment (n=61,482); Variables removed from full model given independent association with long-term use 0.952<RR<1.05: Non-recent depression diagnosis, recent unspecified anxiety diagnosis, recent psychotherapy session, bone mineral density scan,

fainting/dizziness, gait/lack of coordination, osteoporosis, head injury/concussion, dislocation/sprain, other injury, non-psychiatric co-morbidities (anemia, asthma/chronic obstructive pulmonary disease, cardiac dysrhythmia and disorder, gastroesophageal reflux disease, diabetes, epilepsy/recurrent seizures, fatigue/malaise, hypertension, hypothyroidism, liver disease, migraine/chronic headache); One person was excluded from multivariable analysis who initiated on a benzodiazepine in solution form

<sup>b</sup>Index depression diagnosis: other includes adults diagnosed with dysthymic disorder, adjustment disorder with depressed mood, or prolonged depressive reaction; not otherwise specified includes adults without a specific diagnosis

<sup>c</sup>Days supply and quantity values  $\leq 0$  were set to the median value (30), days supply values  $>99$  were truncated to 100, and quantity values  $>200$  were truncated to 200. For patients with multiple agents (0.9%) if one agent was long-acting they were classified as initiating on a long-acting agent and we defined modal dose based on the highest modal dose-per-day classification

<sup>d</sup>Excludes ICD-9 309.0x: Adjustment disorder with depressed mood and 309.1x: Prolonged depressive reaction

<sup>e</sup>Defined with ICD-9 codes=960-979 (range for poisoning by drugs, medicinals and biological substances)

<sup>f</sup>Count of therapeutic group excludes day of antidepressant/benzodiazepine initiation
